# Supplementary material for: One-pot synthesis of novel water-dispersible fluorescent silicon nanoparticles for selective Cr2O72− sensing
Source: Royal Society of Chemistry journal article supplement (doi:10.1039/d0ay01977a), 2020-12-08
Supplement: d0ay01977a1.pdf [file d0ay01977a1.pdf]

**Supporting Information for**

**One-pot synthesis of novel water-dispersible fluorescent silicon nanoparticles for  
selective  $\text{Cr}_2\text{O}_7^{2-}$  sensing**

Qiaoqiao Wen <sup>a,1</sup>, Congjie Pan <sup>a,1,\*</sup>, Xuezhen Qin <sup>a</sup>, Qiujuan Ma <sup>a</sup>, Suxiang Feng <sup>a,\*</sup>

<sup>a</sup> *School of Pharmacy, Henan University of Chinese Medicine, Zhengzhou, 450046,  
PR China*

<sup>1</sup> Q.Q. Wen and C.J. Pan contributed equally to this work as first authors.

**\*Corresponding author at:** College of Pharmacy, Henan University of Chinese  
Medicine, Zhengzhou, 450046, China

E-mail address: pancongjie@hactcm.edu.cn (C.J. Pan); fengsx221@163.com (S.X.  
Feng).

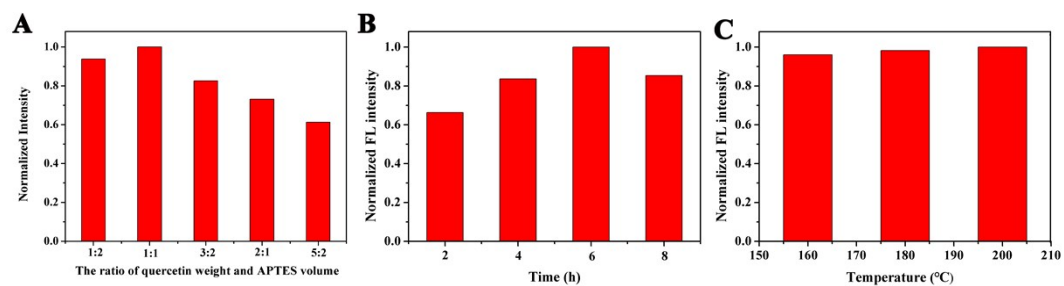

**Figure S1** Normalized FL intensity of the SiNPs synthesized at different ratio of quercetin weight and APTES volume (A), different reaction time (B) and different reaction temperature (C).

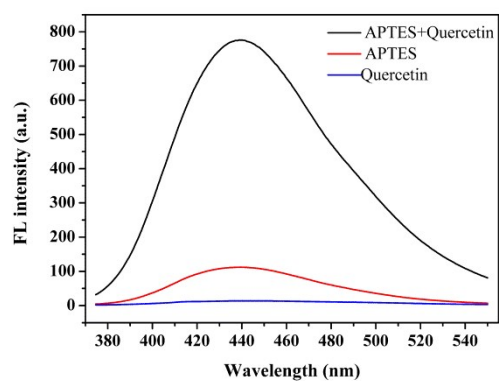

**Figure S2** Fluorescence emission spectra of the reaction product by preparing with APTES+Quercetin, APTES, and Quercetin ( $\lambda_{\text{ex}}=362$  nm).

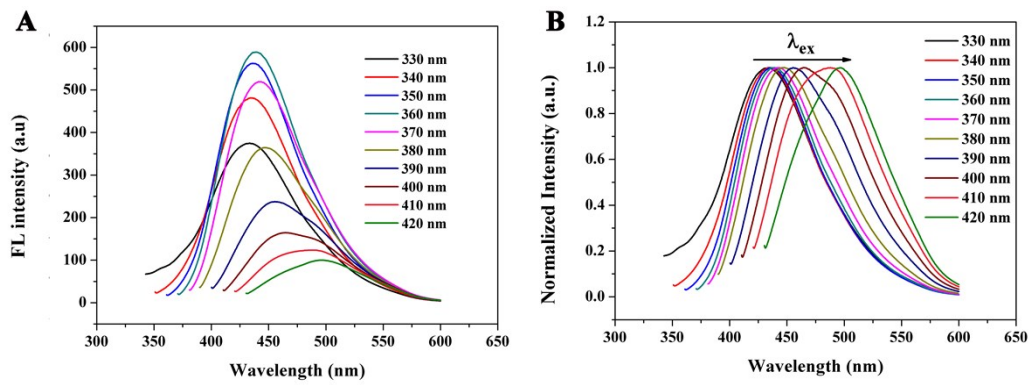

**Figure S3** FL intensity (A), and normalized FL intensity (B) of the prepared SiNPs at different excitation wavelengths.

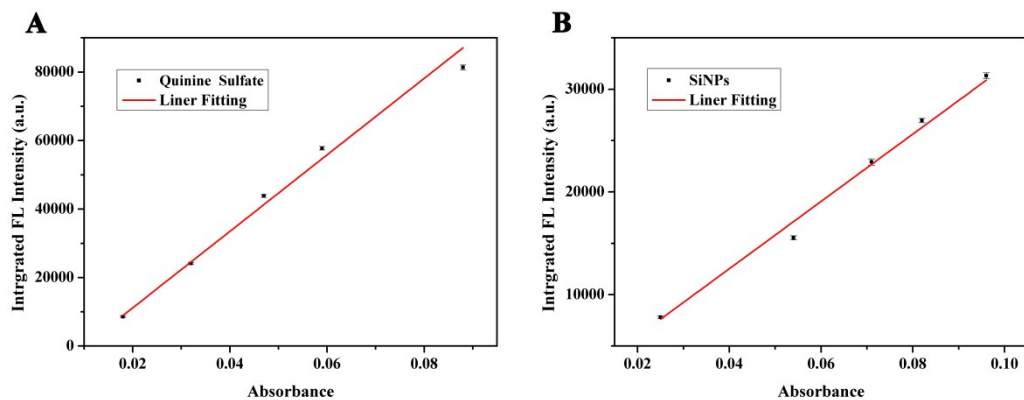

**Figure S4** Plots of integrated FL intensity of quinine sulfate (A) and the prepared SiNPs (B) as a function of optical absorbance at 362 nm. Three repeated measurements were completed for each point.

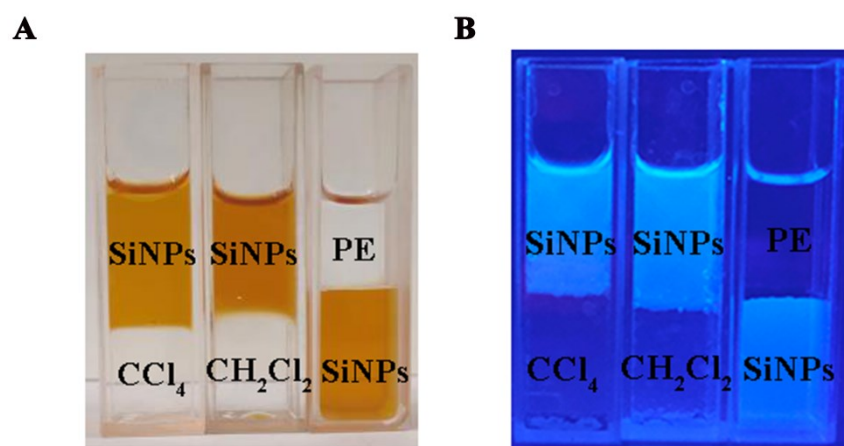

**Figure S5** Photographs of the SiNPs in mixtures of water and carbon tetrachloride ( $\text{CCl}_4$ ), water and dichloromethane ( $\text{CH}_2\text{Cl}_2$ ), and water and petroleum ether (PE) under visible light (A) and 365 nm UV light (B).

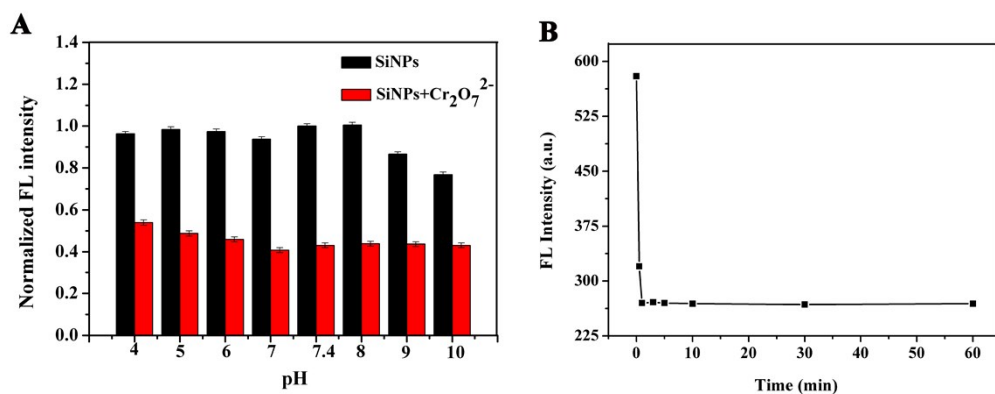

**Figure S6** (A) Normalized FL intensity of the SiNPs (black bars) and the subsequent addition of 50  $\mu\text{M}$   $\text{Cr}_2\text{O}_7^{2-}$  (red bars) at different pH values. (B) Time-dependent FL intensity of the SiNPs with the addition of  $\text{Cr}_2\text{O}_7^{2-}$  (50  $\mu\text{M}$ ) at room temperature.

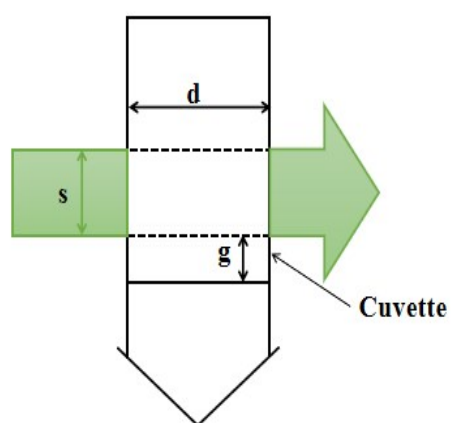

**Figure S7** parameters related to equation 1.



**Table S1** Parameters for quantum yield calculation.

|               | Quinine Sulfate |                    |          |       | SiNPs    |                    |          |       |
|---------------|-----------------|--------------------|----------|-------|----------|--------------------|----------|-------|
| Abs           | 0.018           | 0.032              | 0.047    | 0.059 | 0.025    | 0.054              | 0.071    | 0.082 |
|               |                 | 0.088              |          |       |          | 0.096              |          |       |
| Integrated FL | 8562.10         | 24131.69           | 43834.99 |       | 7804.8   | 15537.48           | 22925.05 |       |
|               |                 | 57775.71           | 71393.29 |       | 26958.46 | 31310.57           |          |       |
| Lope          |                 | $9.18 \times 10^5$ |          |       |          | $3.40 \times 10^5$ |          |       |
| QY            |                 | 55.00%             |          |       |          | 20.34%             |          |       |

**Table S2** Parameters for calculate IFE of  $\text{Cr}_2\text{O}_7^{2-}$  on the fluorescence of the SiNPs.

| $\text{Cr}_2\text{O}_7^{2-}$<br>( $\mu\text{M}$ ) | $A_{\text{ex}}^{\text{a}}$ | $A_{\text{em}}^{\text{b}}$ | $CF^{\text{c}}$ | $F_{\text{obsd}}^{\text{d}}$ | $F_{\text{cor}}^{\text{e}}$ | $E_{\text{obsd}}^{\text{f}}$ | $E_{\text{cor}}^{\text{g}}$ |
|---------------------------------------------------|----------------------------|----------------------------|-----------------|------------------------------|-----------------------------|------------------------------|-----------------------------|
| 0                                                 | 0.232                      | 0.098                      | 1.442           | 602                          | 868                         | 0.0000                       | 0.0000                      |
| 1                                                 | 0.245                      | 0.089                      | 1.447           | 584                          | 845                         | 0.0299                       | 0.0265                      |
| 5                                                 | 0.293                      | 0.099                      | 1.538           | 523                          | 804                         | 0.1312                       | 0.0723                      |
| 10                                                | 0.328                      | 0.097                      | 1.589           | 504                          | 801                         | 0.1628                       | 0.0772                      |
| 20                                                | 0.435                      | 0.107                      | 1.785           | 451                          | 805                         | 0.2508                       | 0.0726                      |
| 30                                                | 0.537                      | 0.115                      | 1.983           | 402                          | 797                         | 0.3322                       | 0.0818                      |
| 40                                                | 0.645                      | 0.124                      | 2.208           | 361                          | 797                         | 0.4003                       | 0.0818                      |

<sup>a</sup> $A_{\text{ex}}$  and <sup>b</sup> $A_{\text{em}}$  are the absorbance of the SiNPs upon addition of  $\text{Cr}_2\text{O}_7^{2-}$  at 362 and 437 nm, respectively.

<sup>c</sup>Corrected factor ( $CF$ ) is calculated as  $F_{\text{cor}}/F_{\text{obsd}}$ .

<sup>d</sup> $F_{\text{obsd}}$  is the measured FL intensity of the SiNPs upon addition of  $\text{Cr}_2\text{O}_7^{2-}$  at 437 nm.

<sup>e</sup> $F_{\text{cor}}$  is the corrected FL intensity with Eq. (1) by removing IFE from the measured FL intensity ( $F_{\text{obsd}}$ ).

<sup>f</sup> $E_{\text{obsd}}=1-F_{\text{obsd}}/F_{\text{obsd},0}$ , in which  $F_{\text{obsd},0}$  is the observed FL intensities of the SiNPs in the absence of  $\text{Cr}_2\text{O}_7^{2-}$ .

<sup>g</sup> $E_{\text{cor}}=1-F_{\text{cor}}/F_{\text{cor},0}$ , in which  $F_{\text{cor},0}$  is the corrected FL intensities of the SiNPs in the absence of  $\text{Cr}_2\text{O}_7^{2-}$ .
